# Supplementary material
Source: publisher figshare collection journal article supplement (https://frontiersin.figshare.com/ndownloader/files/23896676)
Supplement: Supplementary file [file 23896676]

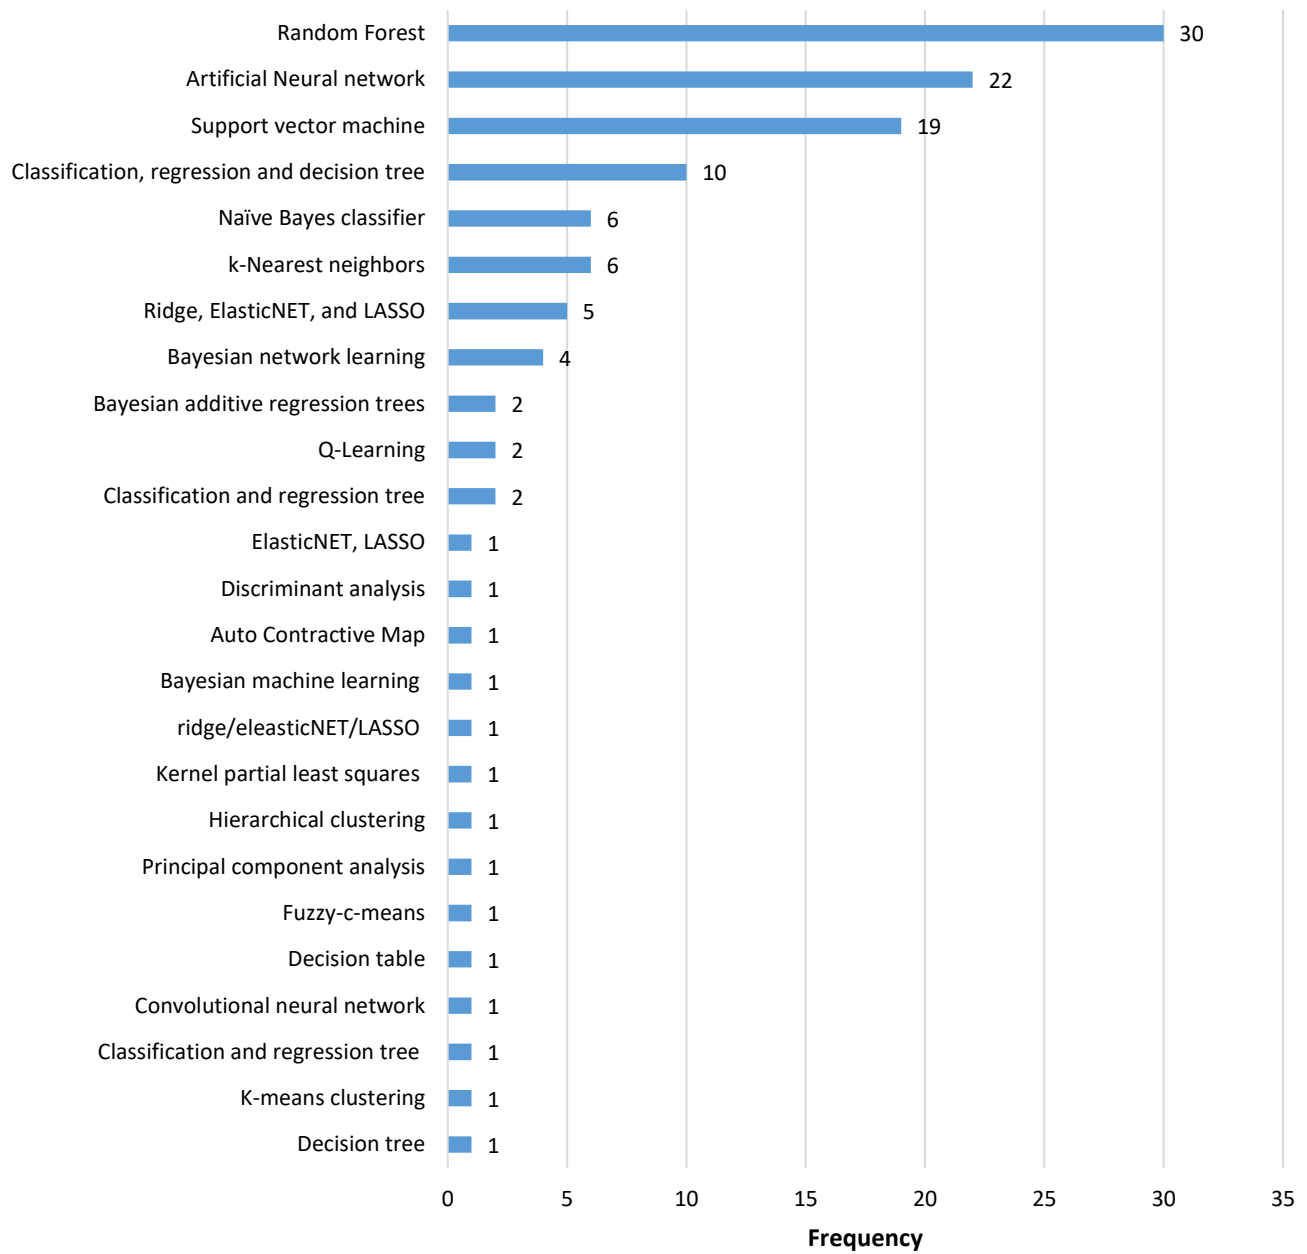

**Supplementary Figure 2.** Artificial intelligence techniques used.
